# Supplementary figures and images for: Recovery of sparse urban greenhouse gas emissions
Source: Copernicus journal article supplement (doi:10.5194/gmd-2021-438), 2022-02-21

**Berlin**

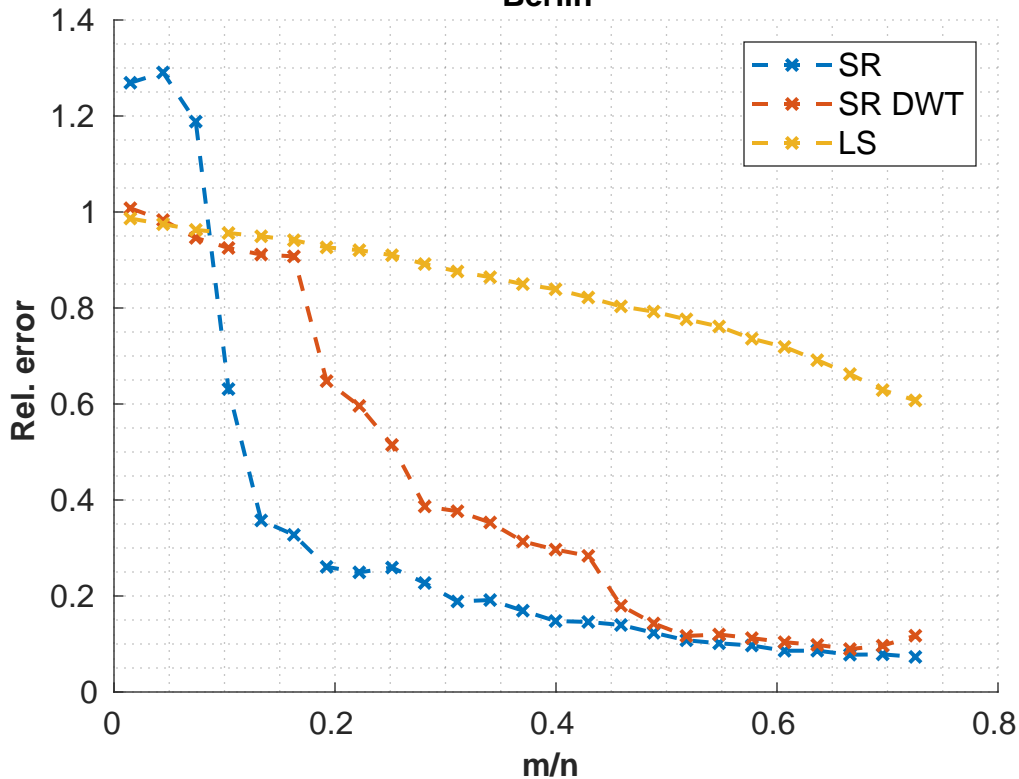

Supplement: Supplementary file 1 [file berlin.pdf › supplement/undersampling/berlin.pdf]

# Hamburg

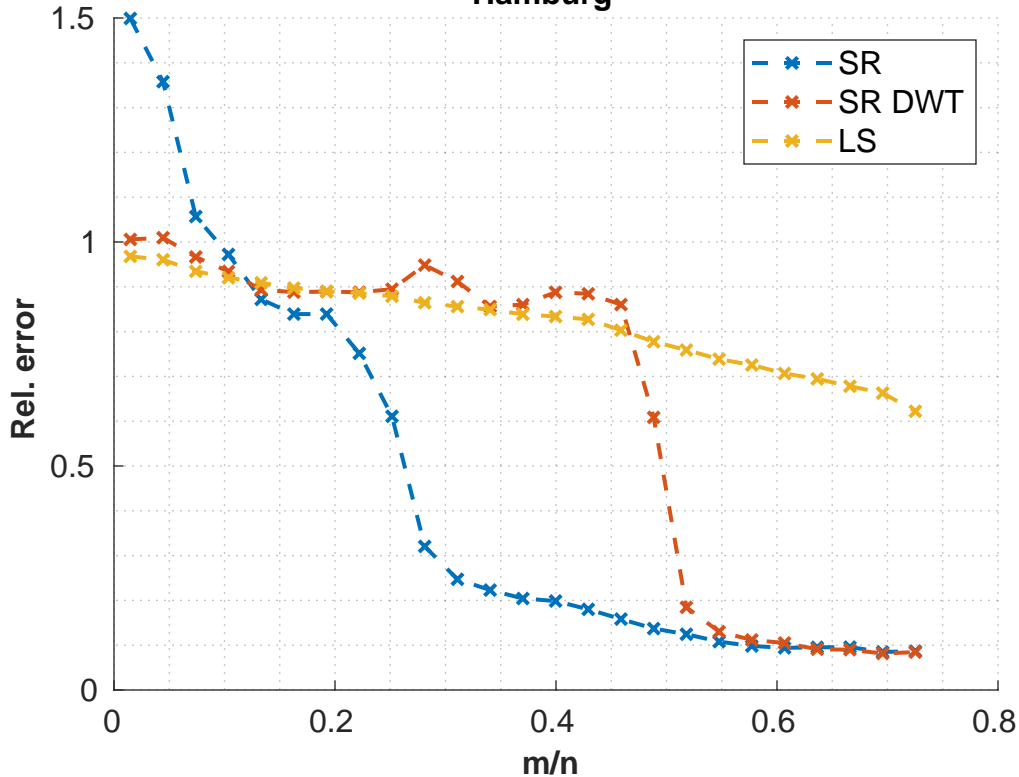

Supplement: Supplementary file 2 [file hamburg.pdf › supplement/undersampling/hamburg.pdf]

# London

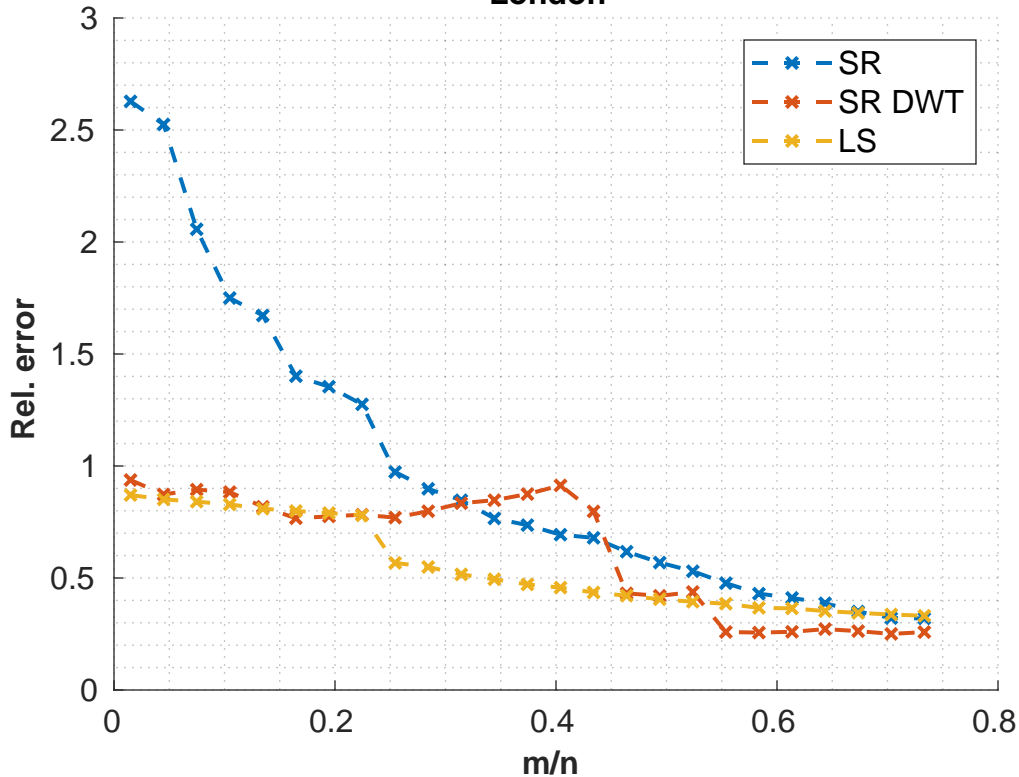

Supplement: Supplementary file 3 [file london.pdf › supplement/undersampling/london.pdf]

# Munich

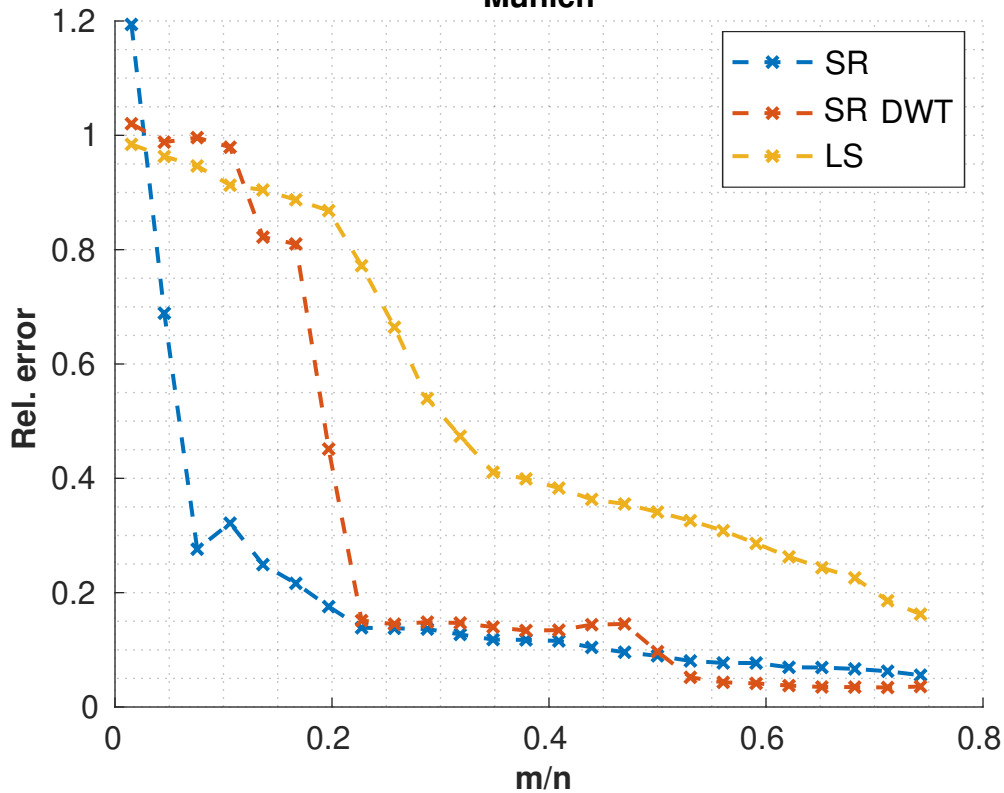

Supplement: Supplementary file 4 [file munich.pdf › supplement/undersampling/munich.pdf]

Paris

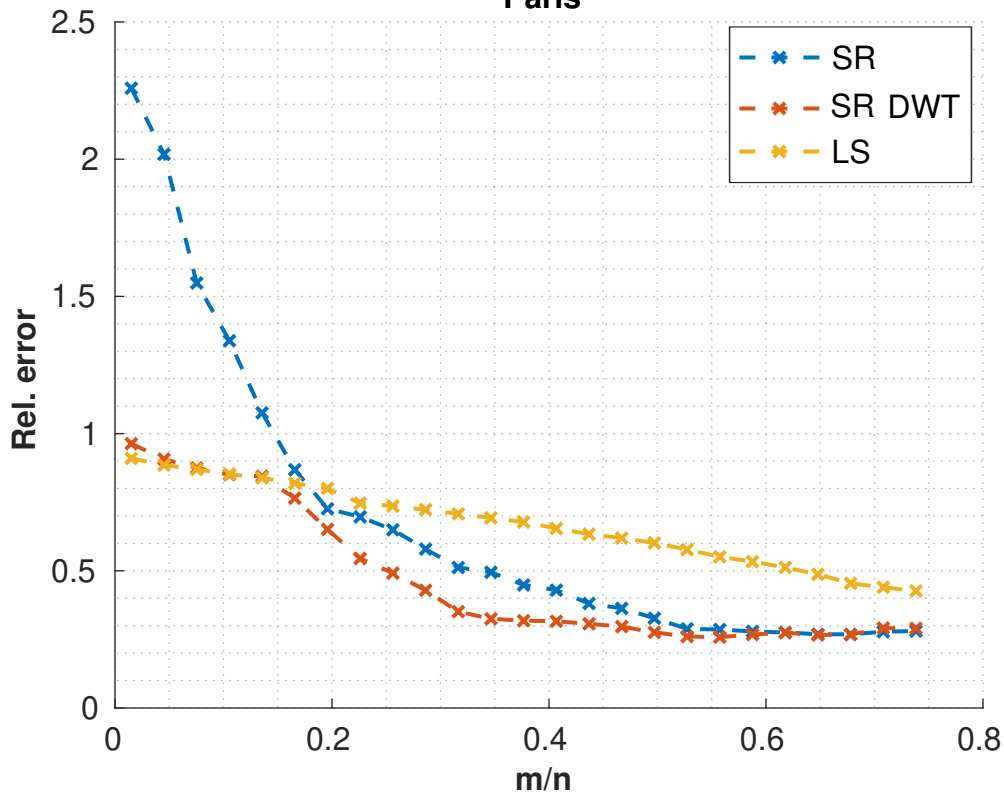

Supplement: Supplementary file 5 [file paris.pdf › supplement/undersampling/paris.pdf]

## Vienna

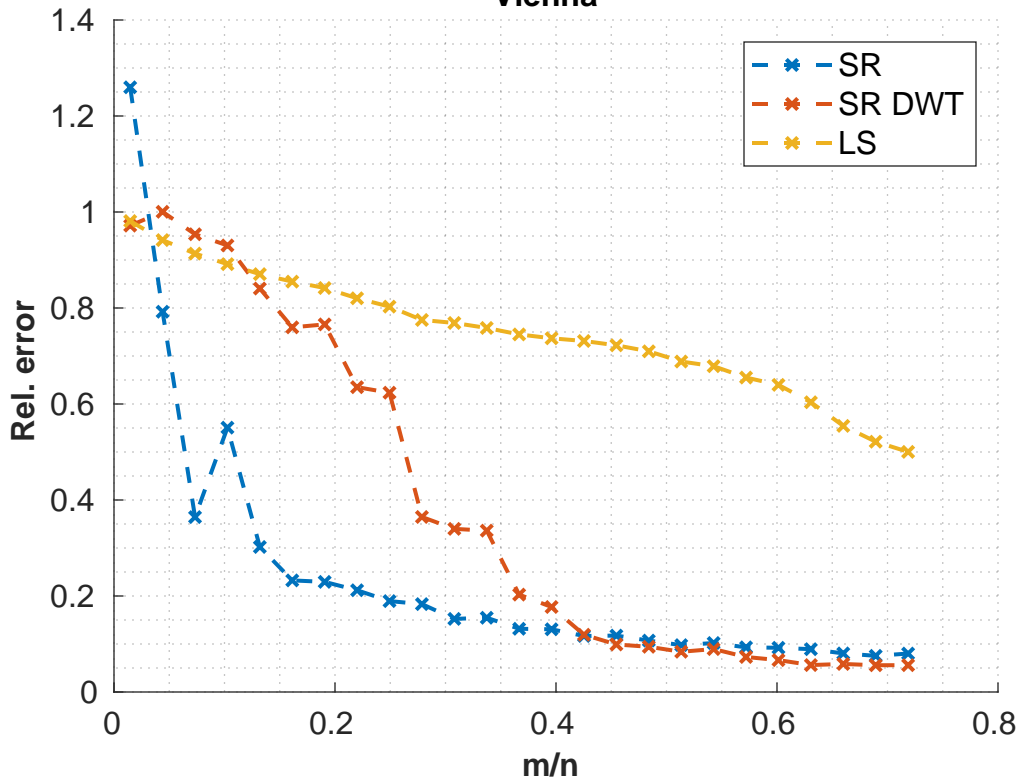

Supplement: Supplementary file 6 [file vienna.pdf › supplement/undersampling/vienna.pdf]
